# Supplementary material
Source: publisher site journal article supplement (https://www.dovepress.com/article/223330)
Supplement: Supplementary file 1 [file get_supplementary_file.php]

## Conversion tool from CAVI to CAVI $\beta$

enter CAVI values

|            |
|------------|
| Right CAVI |
| Left CAVI  |

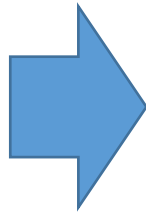

calculated CAVI $\beta$  values

|                    |
|--------------------|
| Right CAVI $\beta$ |
| Left CAVI $\beta$  |

CAVI equation is written as below.

$$\text{CAVI}\beta = 2\rho \cdot \ln(P_s/P_d)/(P_s-P_d) \cdot \text{PWV}^2$$

CAVI $\beta$  is also called CAVI',  $\beta'$  or ha $\beta$

$$\text{CAVI} = a \cdot \text{CAVI}\beta + b$$

$$\text{CAVI}\beta = (\text{CAVI} - b) / a$$

### Coefficients "a" and "b" in CAVI

| CAVI $\beta$ before transformation | Low Range<br><7.34875 | Middle Range | High Range<br>$\geq 10.30372$ |
|------------------------------------|-----------------------|--------------|-------------------------------|
| Coefficient a                      | 0.85                  | 0.658        | 0.432                         |
| Coefficient b                      | 0.695                 | 2.103        | 4.441                         |

**Abbreviations:** CAVI, cardio-ankle vascular index; CAVI $\beta$ , CAVI without the coefficients "a" and "b"; Ps, systolic blood pressure; Pd, diastolic blood pressure.
