# Supplementary material
Source: publisher site journal article supplement (https://www.dovepress.com/article/223330)
Supplement: Supplementary file 2 [file get_supplementary_file.php]

**Supplement**

Bramwell–Hill equation is represented by Seq.1.

$$PWV^2 = \frac{dP}{dD} \times \frac{D}{2\rho} \quad \text{Seq.1}$$

(PWV: pulse wave velocity, P: blood pressure, D: blood vessel diameter,  $\rho$ : blood density)

Here,  $\frac{dP}{dD} \times \frac{D}{2}$  is the bulk modulus, which represents how hard it is for the vessel to expand in diameter D against the change of pressure P. Seq.1 is a general equation expressing the relationship between the wave velocity and the bulk modulus. If the bulk modulus is constant, the wave velocity PWV is also constant. In actual blood vessels, P changes exponentially with the change of D, which is indicated by the stiffness parameter  $\beta$  equation of Seq.2

$$P = P_0 \times e^{\beta \times (\frac{D}{D_0} - 1)} \quad \text{Seq.2}$$

( $\beta$ : specific stiffness of the blood vessel,  $P_0$ : reference pressure,  $D_0$ : blood vessel diameter at  $P_0$ )

This exponential nature of the blood vessel causes blood pressure dependency in PWV as follows:

When both sides of Seq.2 are differentiated with D, the exponent  $\frac{\beta}{D_0}$  becomes a

19 coefficient from the differential formula of exponential,

$$20 \quad \frac{dP}{dD} = \frac{\beta}{D_0} \times P \quad \text{Seq.3}$$

21 Substituting Seq.3 for the right side of Seq.1,

$$22 \quad PWV^2 = \frac{\beta}{D_0} \times P \times \frac{D}{2\rho} \quad \text{Seq.4}$$

23  $\beta$  is represented by Seq.5 by transforming Seq.4.

$$24 \quad \beta = \frac{2\rho \times PWV^2}{P} \times \left(\frac{D_0}{D}\right) \quad \text{Seq.5}$$

25 By dividing both sides of Seq.2 by  $P_0$  and taking the natural logarithm,

$$26 \quad \ln\left(\frac{P}{P_0}\right) = \beta \times \left(\frac{D-D_0}{D_0}\right) \quad \text{Seq.6}$$

$$27 \quad \text{From Seq.6, } \frac{D_0}{D} = 1 / \left(1 + \frac{\ln\left(\frac{P}{P_0}\right)}{\beta}\right) \quad \text{Seq.7}$$

28 Substitute Seq.7 for Seq.5 and organize it with  $\beta$ ,

$$29 \quad \beta = \frac{2\rho \times PWV^2}{P} - \ln\left(\frac{P}{P_0}\right) \quad \text{Seq.8}$$

30 Since in the physiological range, the second term of right side of Seq.8 is generally

31 small compared to the first term,  $PWV^2$  is approximately proportional to  $\beta$  and  $P$ .

32
